# Supplementary material for: Near-Infrared In Vivo Imaging of Claudin-1 Expression by Orthotopically Implanted Patient-Derived Colonic Adenoma Organoids
Source: MDPI journal article supplement (doi:10.3390/diagnostics14030273), 2024-01-26
Supplement: s1 [file s1]

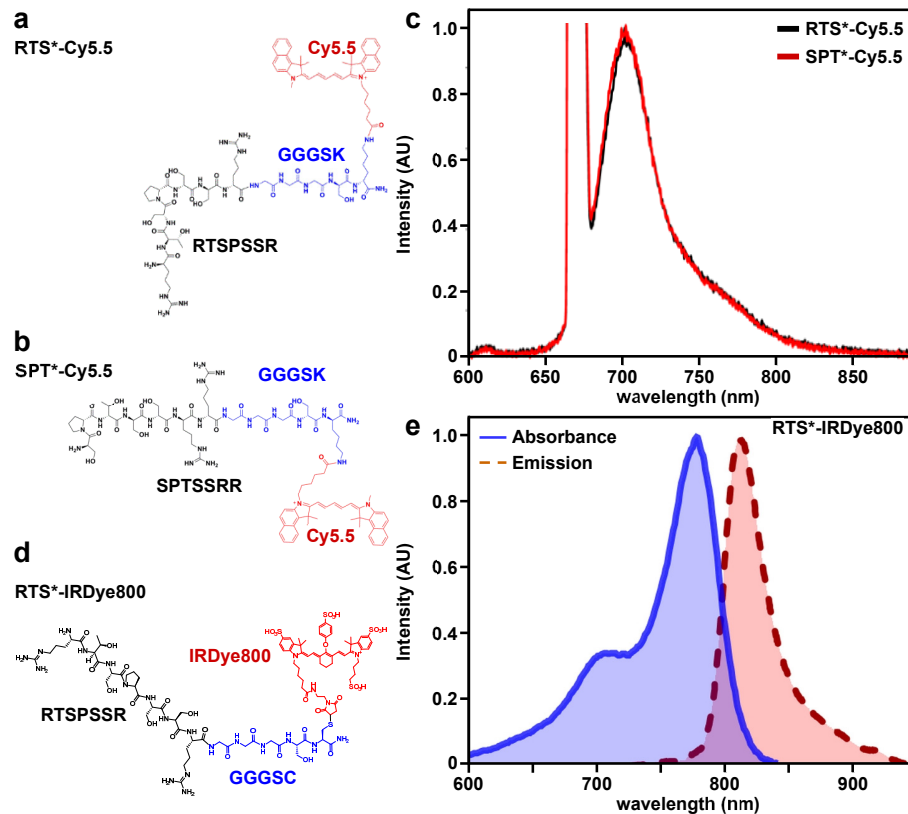

**Figure S1.** Peptides specific for claudin-1. (a) RTSPSSR was labeled with IRDye800CW (red) via a GGGSC linker (blue), and (b) with Cy5.5 (red) via a GGGSK linker (blue) to prevent steric hindrance. (c) SPTSSRR (control) was labeled with Cy5.5 (red) via a GGGSK linker (blue). (d) Peak absorbance and fluorescence emission wavelengths for RTS\*-IRDye800 were identified at  $\lambda_{\text{abs}} = 785$  nm and  $\lambda_{\text{em}} = 812$  nm, respectively. (e) Fluorescence emission spectra for RTS\*-Cy5.5 and SPT\*-Cy5.5 peaked at  $\lambda_{\text{em}} = 710$  nm. Peak absorbance and fluorescence emission wavelengths in the NIR spectrum minimize tissue autofluorescence, hemoglobin absorption, and tissue scattering.

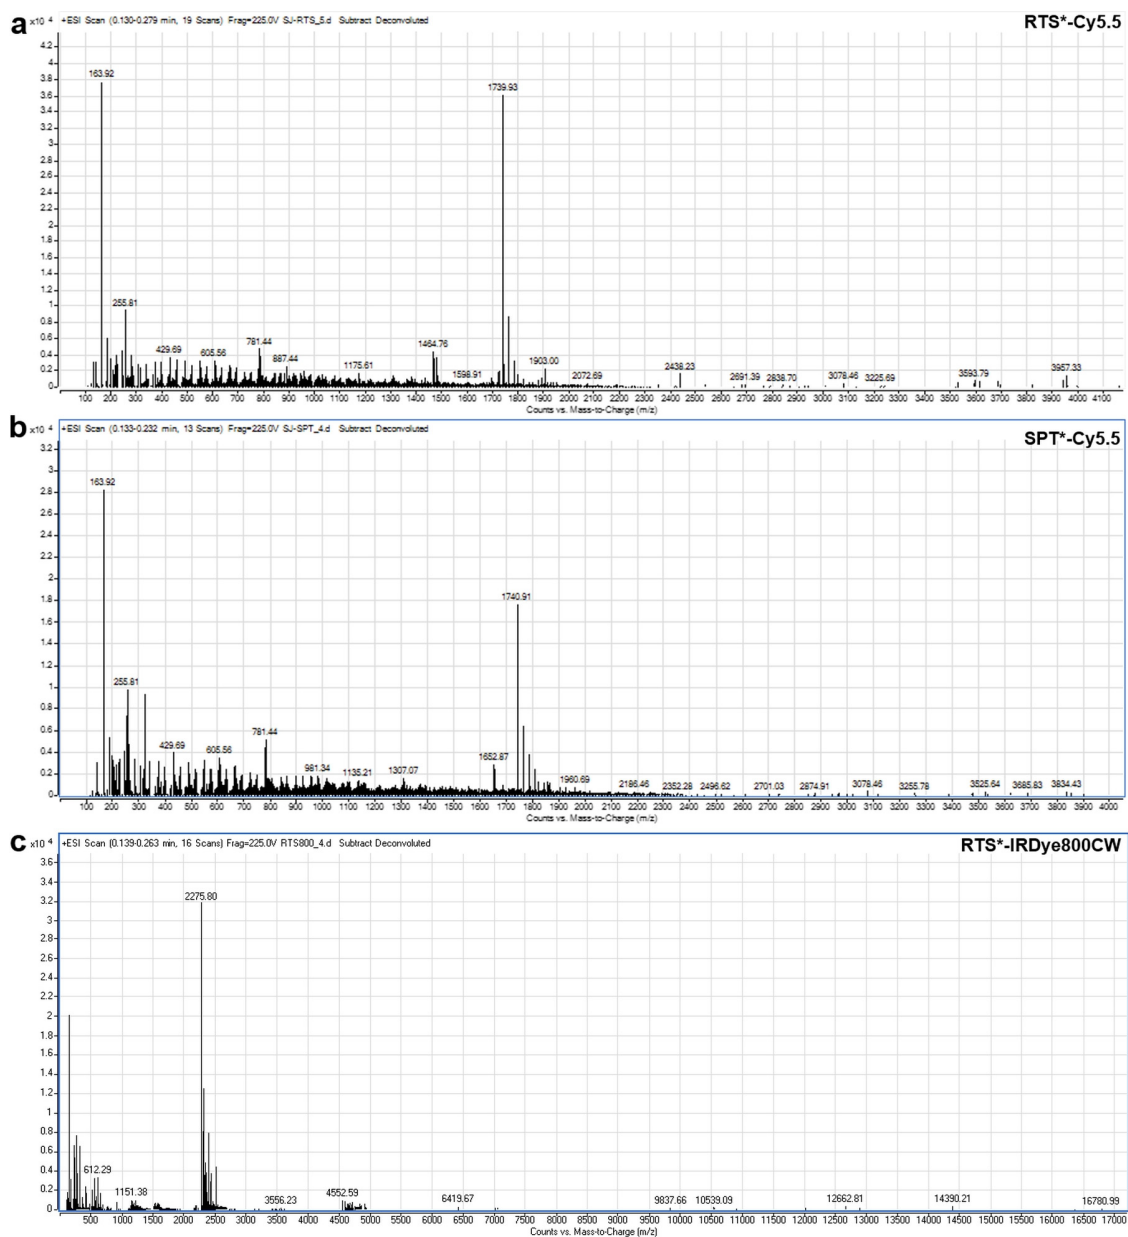

**Figure S2.** Mass spectrometry. (a) A mass-to-charge ( $m/z$ ) ratio of 2275.80 was measured for RTS\*-IRDye800CW, which agreed with the expected value of 2275.81. A mass-to-charge ( $m/z$ ) ratio of 1739.93 and 1740.91 were measured for (b) RTS\*-Cy5.5 and (c) SPT\*-Cy5.5, respectively, which agreed with the expected values.

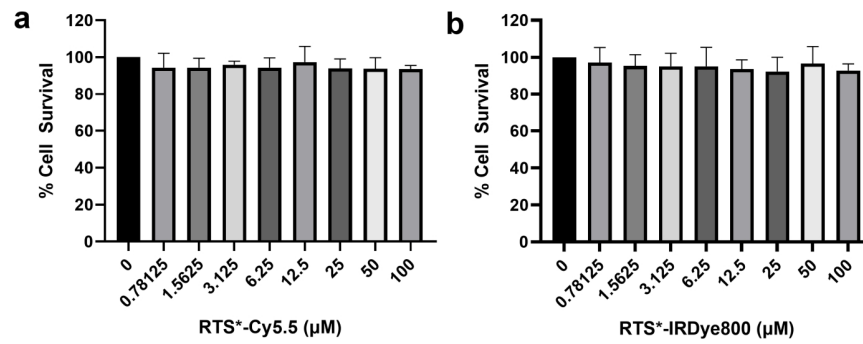

**Figure S3.** Peptide cytotoxicity to normal cells. MTT assay showed no effect on survival with normal human colon cells (CCD 841 CoN) following treatment with (a) RTS\*-Cy5.5 and (b) RTS\*-IRDye800,  $P = 0.88$  and  $P = 0.93$ , respectively, using a one-way ANOVA model.
