# Supplementary material for: Near-Infrared In Vivo Imaging of Claudin-1 Expression by Orthotopically Implanted Patient-Derived Colonic Adenoma Organoids
Source: Diagnostics (Basel). 2024 Jan 26;14(3):273. doi: 10.3390/diagnostics14030273 (PMC10854921; doi:10.3390/diagnostics14030273)
Supplement: Supplementary file 1 [file diagnostics-14-00273-s001.zip]

Archive with 5 entries (5 files):
- Figures S1-S3.pdf
- Video S1.avi
- Video S2.avi
- Video S3.avi
- Video S4.avi
